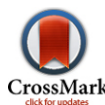

## Correction

# Correction: Factors Affecting the Accuracy of Controlled Attenuation Parameter (CAP) in Assessing Hepatic Steatosis in Patients with Chronic Liver Disease

## The PLOS ONE Staff

The fifth author's name is misspelled. The correct name is Kyeong Hyeon Chun. The correct citation is:

Jung KS, Kim BK, Kim SU, Chon YE, Chun KH, et al. (2014) Factors Affecting the Accuracy of Controlled Attenuation Parameter (CAP) in Assessing Hepatic Steatosis in Patients with Chronic Liver Disease. PLoS ONE 9(6): e98689. doi:10.1371/journal.pone.0098689

## Reference

1. Jung KS, Kim BK, Kim SU, Chon YE, Cheon KH, et al. (2014) Factors Affecting the Accuracy of Controlled Attenuation Parameter (CAP) in Assessing Hepatic Steatosis in Patients with Chronic Liver Disease. PLoS ONE 9(6): e98689. doi:10.1371/journal.pone.0098689

---

**Citation:** The PLOS ONE Staff (2014) Correction: Factors Affecting the Accuracy of Controlled Attenuation Parameter (CAP) in Assessing Hepatic Steatosis in Patients with Chronic Liver Disease. PLoS ONE 9(8): e107331. doi:10.1371/journal.pone.0107331

**Published:** August 27, 2014

**Copyright:** © 2014 The PLOS ONE Staff. This is an open-access article distributed under the terms of the Creative Commons Attribution License, which permits unrestricted use, distribution, and reproduction in any medium, provided the original author and source are credited.
